# Supplementary material
Source: PubMed Central journal article supplement (PMC7540166)
Supplement: ajtr0012-5449-f7.pdf [file ajtr0012-5449-f7.pdf]

## Intervertebral disc degeneration and TUG1/miR-26a/HMGB1 axis

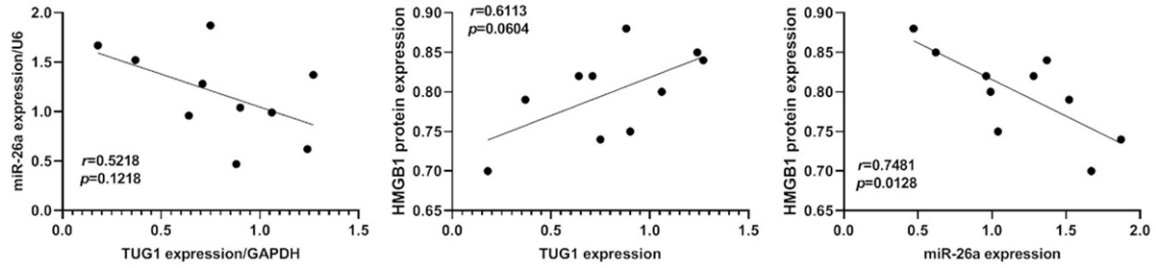

**Figure S1.** The relationship between TUG1 and miR-26a, TUG1 and HMGB1, or miR-26a and HMGB1 in NP tissues of LVF group.

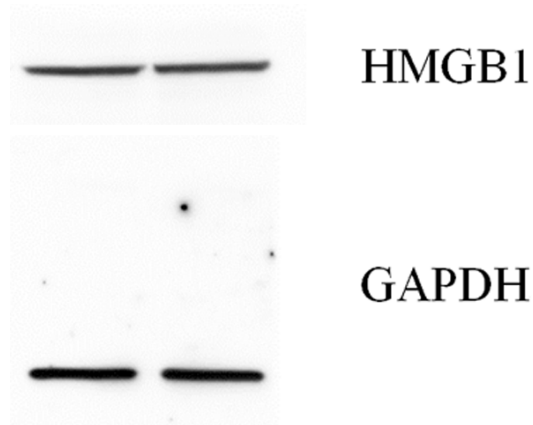

**Figure S2.** Protein expression of HMGB1 protein in NP tissues.

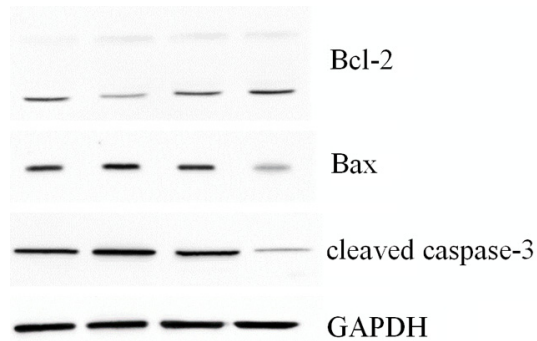

**Figure S3.** Apoptosis-related proteins Bcl-2, Bax and cleaved caspase-3 expression were detected by western blot assay in human degenerated intervertebral disc NPCs transfected for 48 h.

Intervertebral disc degeneration and TUG1/miR-26a/HMGB1 axis

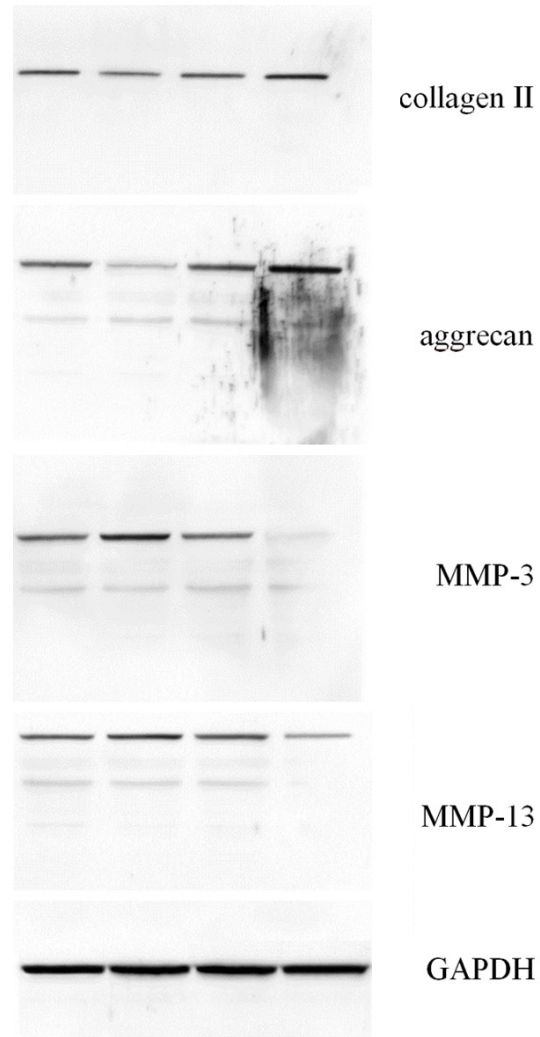

**Figure S4.** ECM degradation-related proteins collagen II, aggrecan, MMP-3 and MMP-13 expression were detected by western blot assay in human degenerated intervertebral disc NPCs transfected for 48 h.

Intervertebral disc degeneration and TUG1/miR-26a/HMGB1 axis

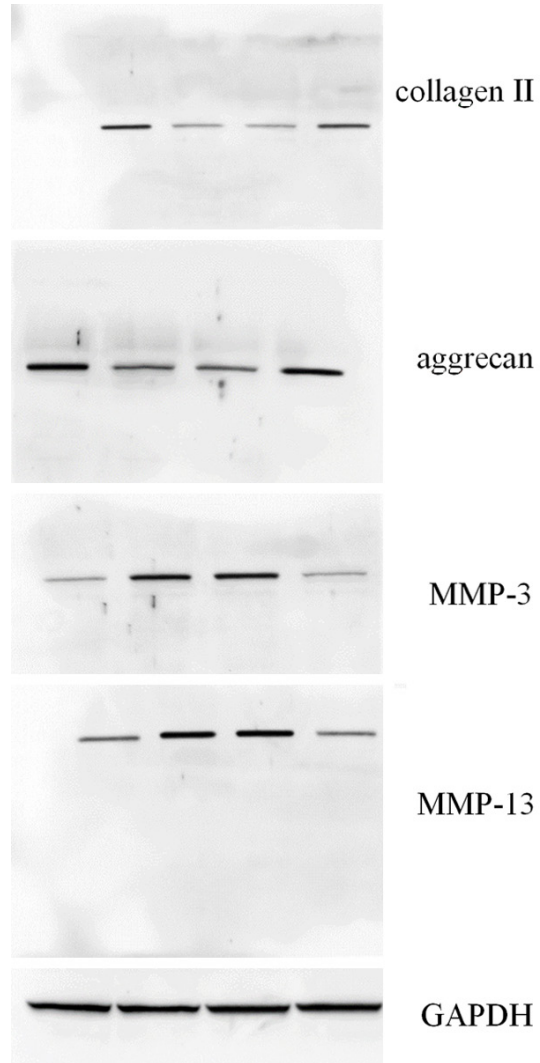

**Figure S5.** The expression of collagenII, aggrecan, MMP-3 and MMP-13 were determined in treated human degenerated intervertebral disc NPCs by western blot assay.

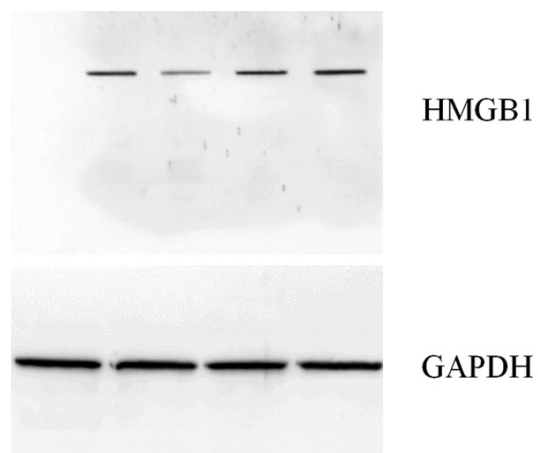

**Figure S6.** The expression of HMGB1 protein was examined in human degenerated intervertebral disc NPCs transfected with miR-26a mimic or miR-26a inhibitor.

Intervertebral disc degeneration and TUG1/miR-26a/HMGB1 axis

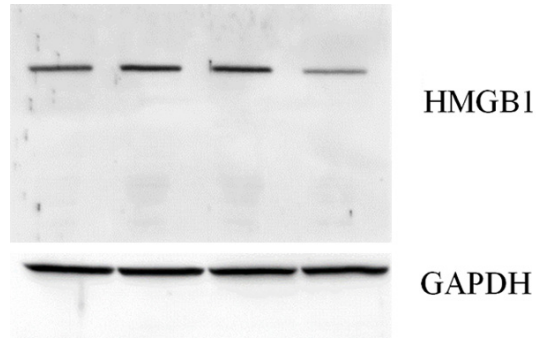

**Figure S7.** The expression of HMGB1 protein in NPCs transfected with pcDNA, pcDNA-TUG1, pcDNA-TUG1+miR-NC and pcDNA-TUG1+miR-26a mimic.

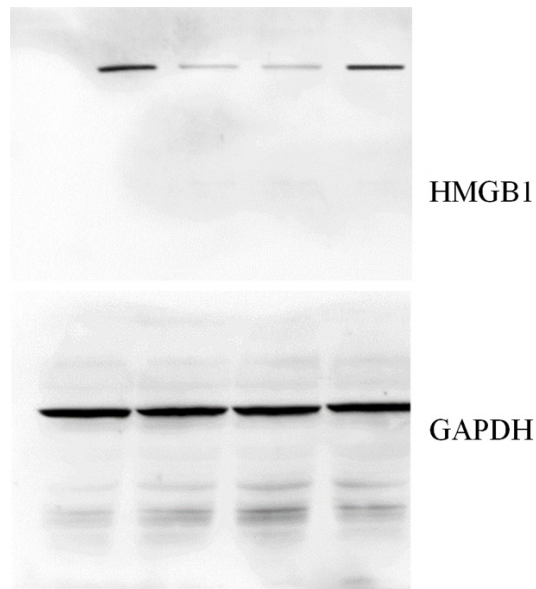

**Figure S8.** The expression of HMGB1 protein in NPCs transfected with si-NC, si-TUG1, si-TUG1+inhibitor-NC, si-TUG1+miR-26a inhibitor.

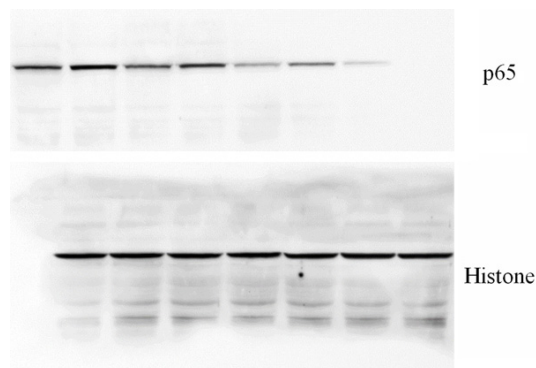

**Figure S9.** The expression of NF-κB p65 in nuclear was analyzed by western blot.
